# Supplementary material for: Efficient removal of both basic and non-basic nitrogen compounds from fuels by deep eutectic solvents
Source: Royal Society of Chemistry journal article supplement (doi:10.1039/c5gc01823d), 2015-09-07
Supplement: c5gc01823d1.pdf [file c5gc01823d1.pdf]

## Supporting Information

### **Efficient removal of both basic and non-basic nitrogen compounds from fuels by deep eutectic solvents**

Mohammad Chand Ali,<sup>a</sup> Qiwei Yang,<sup>\*a</sup> Andrew Aaron Fine,<sup>b</sup> Wenbin Jin,<sup>a</sup> Zhiguo Zhang,<sup>a</sup> Huabin Xing<sup>a</sup> and Qilong Ren<sup>\*a</sup>

Fig. S1 Effect of shaking time on the distribution coefficients of pyridine and carbazole by DES3 at 308 K and 1:1 DES:oil mass ratio

Fig. S2 Optimized geometries of HBD molecules and anions used for the calculation of proton dissociation enthalpy

---

<sup>a</sup> Key Laboratory of Biomass Chemical Engineering of Ministry of Education, College of Chemical and Biological Engineering, Zhejiang University, Hangzhou 310027, China. Email: yangqw@zju.edu.cn (Q. Yang); renql@zju.edu.cn (Q. Ren); Tel: +86(571)87951225

<sup>b</sup> Department of Chemical and Biological Engineering, University of Wisconsin-Madison, 1415 Engineering Dr, Madison, WI 53706, United States

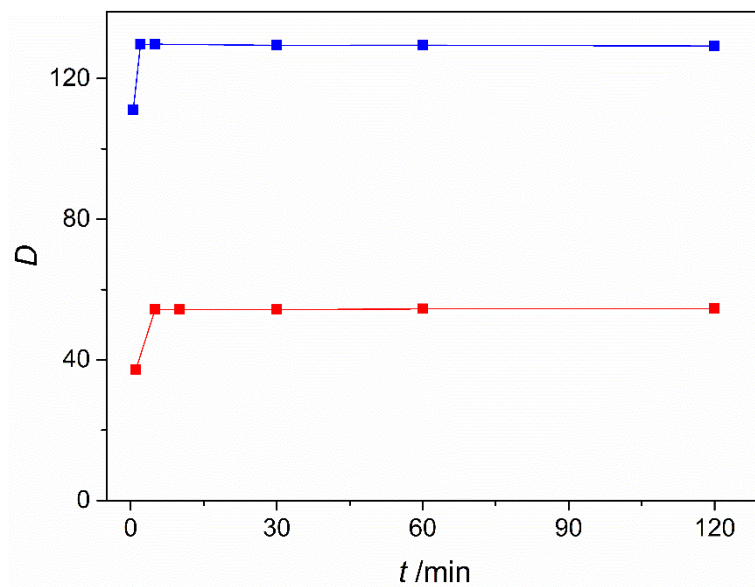

**Fig. S1** Effect of shaking time on the distribution coefficients of pyridine (blue) and carbazole (red) by DES3 at 308 K and 1:1 DES:oil mass ratio

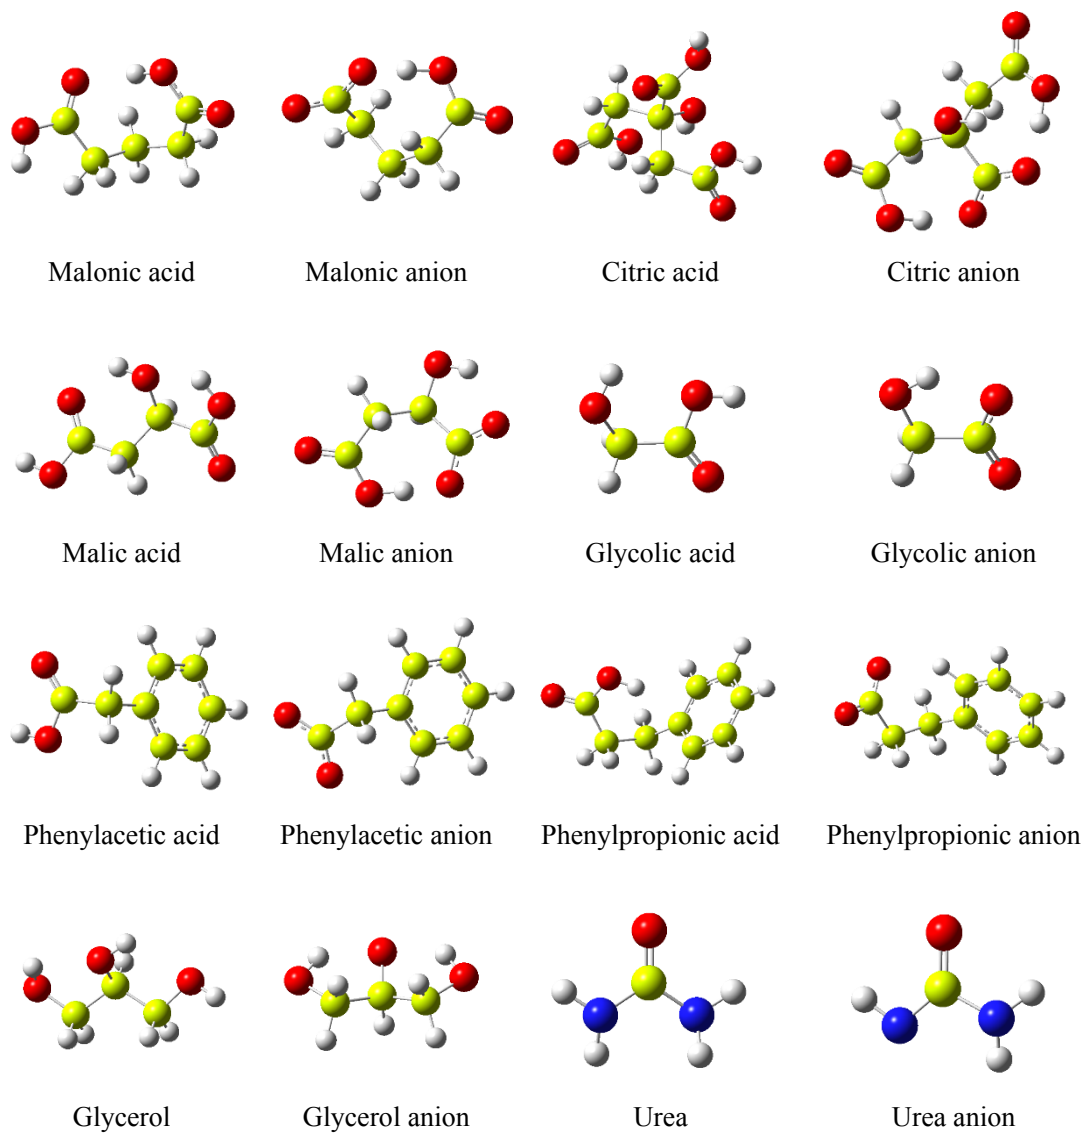

**Fig. S2** Optimized geometries of HBD molecules and anions used for the calculation of proton dissociation enthalpy
